# Supplementary material
Source: publisher figshare collection journal article supplement (https://karger.figshare.com/ndownloader/files/36428481)
Supplement: Supplementary file 1 [file 36428481]

**Supplement S8: Continuous confounding factors on left ventricular stroke volume (LV-SV) bias**

|  | LV-SV bias | | |
| --- | --- | --- | --- |
|  | coefficent | (95% CI) | p-value |
| EC Signal quality (propcycles) | 0.01 | (0.00 to 0.02) | .003 |
| Intercept (propcycles=51%) | 0.08 | (-0.15 to 0.31) |  |
| Heart rate (HREC) | -0.01 | (-0.02 to 0.00) | .005 |
| Intercept (HREC=121 bpm) | 0.69 | (0.42 to 0.97) |  |
| LV-SVEC | 0.45 | (0.31 to 0.59) | <.001 |
| Intercept (LV-SVEC=0.7mL) | 0.03 | (-0.11 to 0.16) |  |
| LV-SVTTE | -0.04 | (-0.31 to 0.24) | .799 |
| Intercept (LV-SVTTE=0.46mL) | 0.37 | (0.15 to 0.59) |  |

EC: Electrical Cardiometry, TTE: transthoracic echocardiography, propcycles: proportion of cycles with increasing or maximum EC signal quality within the 10s epoch
